# Supplementary material for: Antioxidant properties of flavonoid derivatives and their hepatoprotective effects on CCl4induced acute liver injury in mice
Source: Royal Society of Chemistry journal article supplement (doi:10.1039/c8ra02523a), 2018-01-01
Supplement: c8ra02523a1.pdf [file c8ra02523a1.pdf]

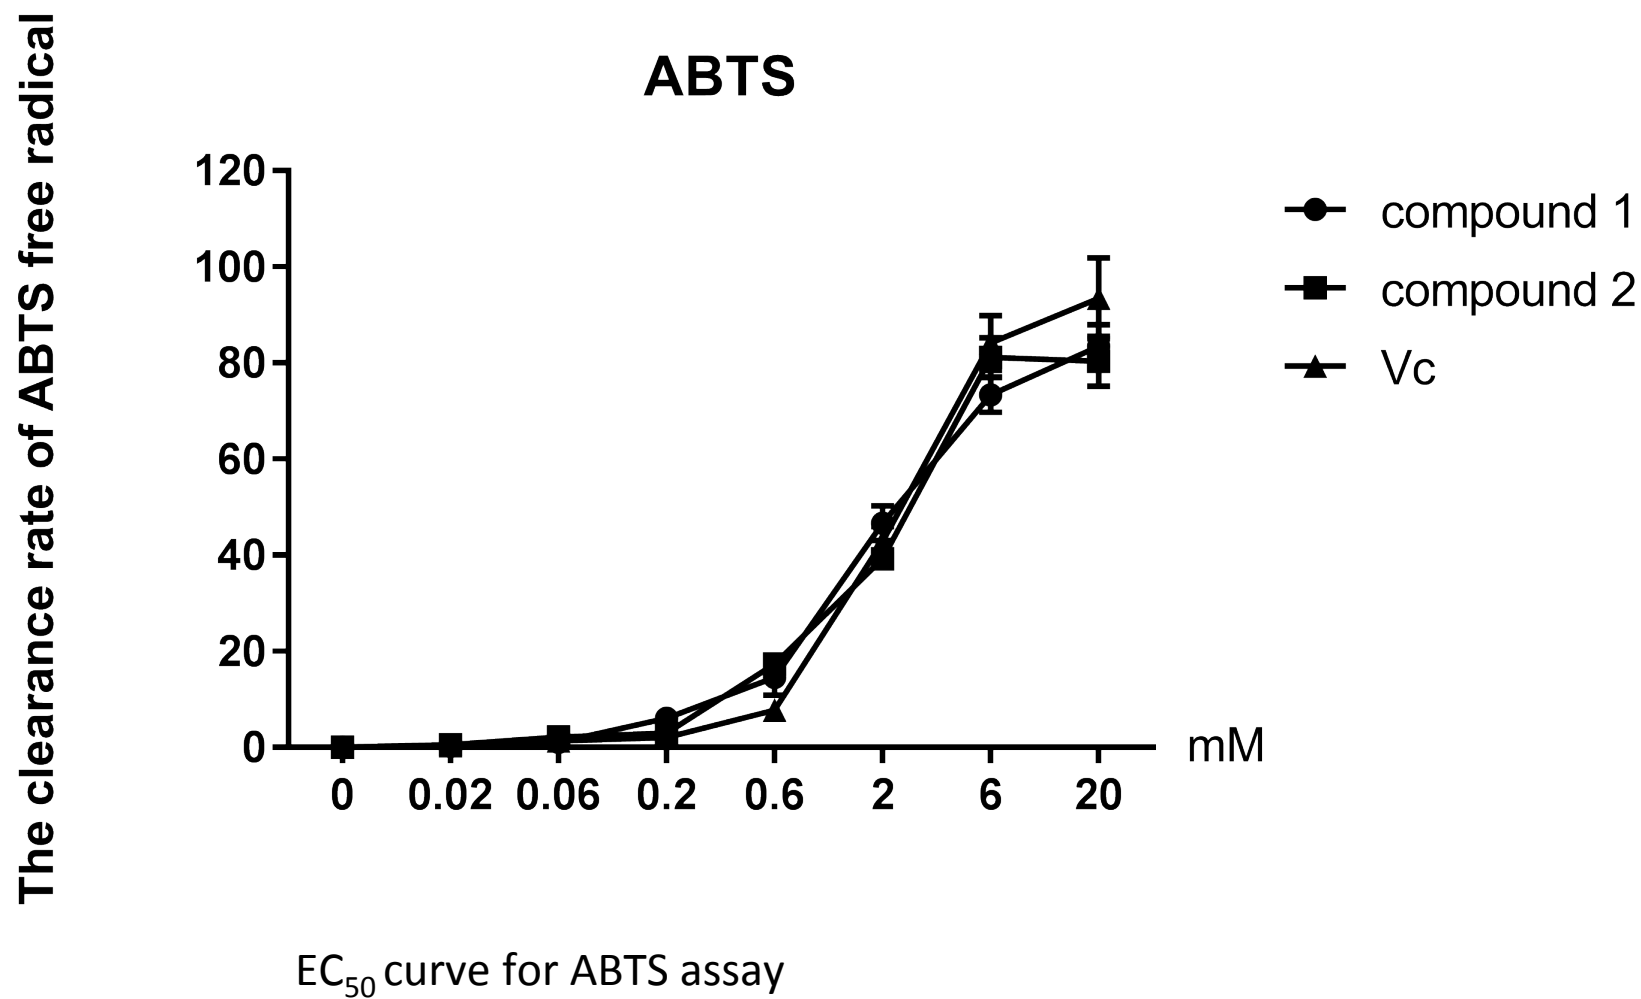

The clearance rate of DPPH free radical

### DPPH

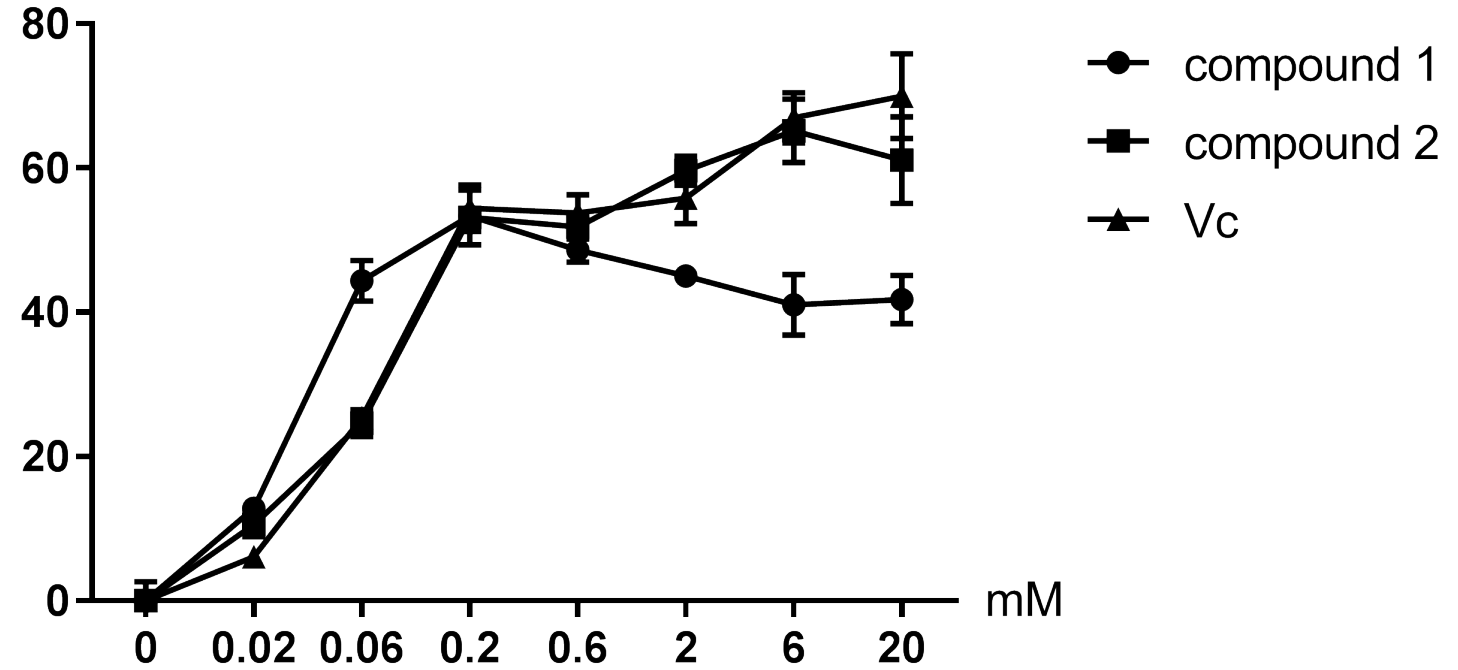

EC<sub>50</sub> curve for DPPH assay

# FRAP

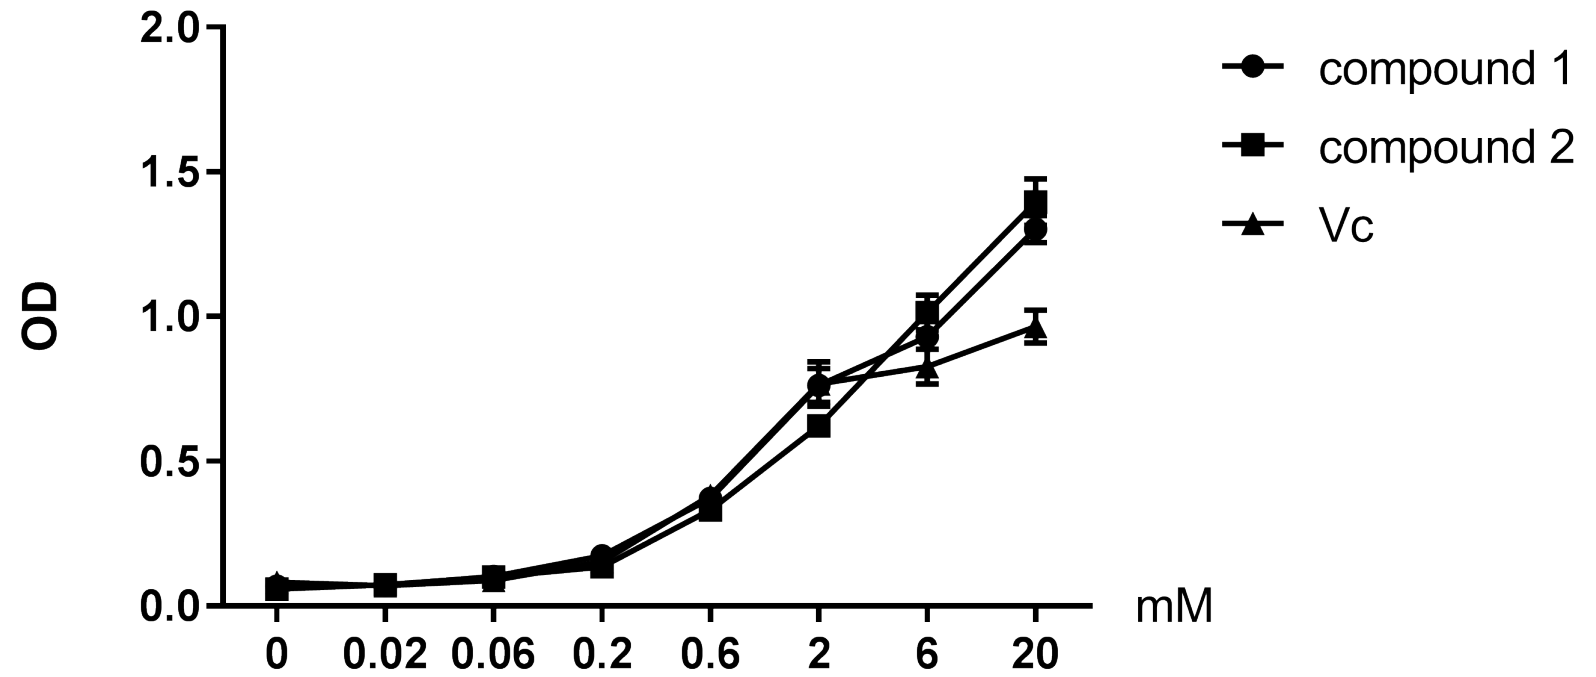

EC<sub>50</sub> curve for FRAP assay

### Vc standard curve line

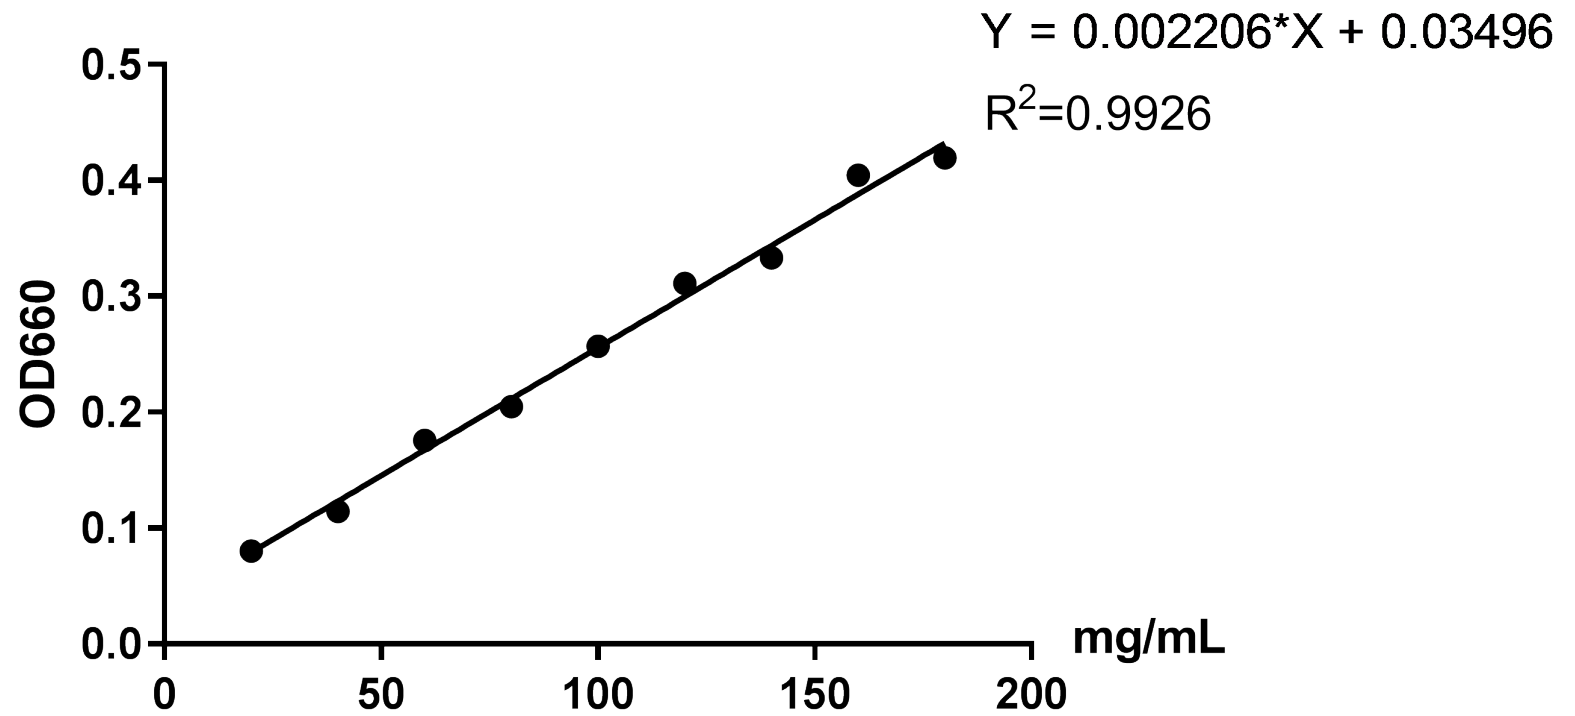

VC standard curve for FRAP assay
